# Supplementary figures and images for: Synergistic effect of ammonium polyphosphate and silicone macromolecular charring agent on improving flame retardancy and mechanical properties of ethylene-butyl acrylate copolymer composites
Source: Research Square preprint supplement (doi:10.21203/rs.3.rs-5899117/v1), 2025-02-03

**Graphic Abstract**


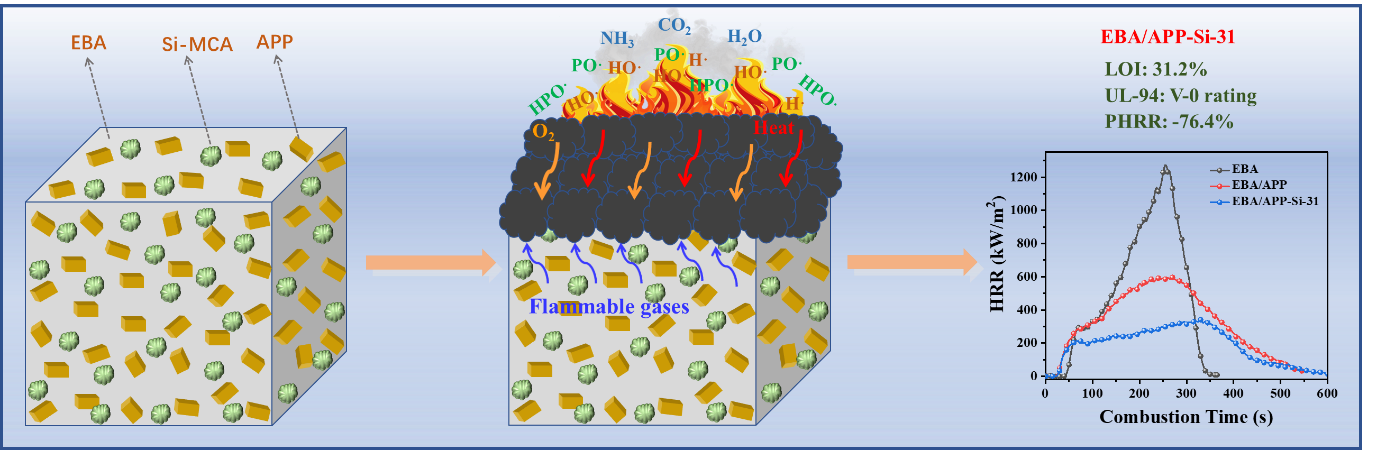

Supplement: Supplementary file 1 [file bb5eb70306326e14765047d3.docx]
